# Supplementary material for: Relevance of the electron transfer pathway in photodynamic activity of Ru(ii) polypyridyl complexes containing 4,7-diphenyl-1,10-phenanthroline ligands under normoxic and hypoxic conditions
Source: Royal Society of Chemistry journal article supplement (doi:10.1039/d1dt02908h), 2021-12-21
Supplement: d1dt02908h1.pdf [file d1dt02908h1.pdf]

Supplementary information for

## Relevance of electron transfer pathway in photodynamic activity of Ru(II) polypyridyl complexes containing 4,7-diphenyl-1,10-phenanthroline ligands under normoxic and hypoxic conditions

Olga Mazuryk<sup>a\*</sup>, Ewelina Janczy-Cempa<sup>a</sup>, Justyna Lagoszz<sup>a</sup>, Dorota Rutkowska-Zbik<sup>b</sup>, Agata Machnicka<sup>a</sup>, Aneta Krasowska<sup>a</sup>, Piotr Pietrzyk<sup>a</sup>, Grażyna Stochel<sup>a</sup>, Małgorzata Brindell<sup>a</sup>

<sup>a</sup>Department of Inorganic Chemistry, Faculty of Chemistry, Jagiellonian University in Kraków, Gronostajowa 2, 30-387 Krakow, Poland, e-mail: mazuryk@chemia.uj.edu.pl

<sup>b</sup>Jerzy Haber Institute of Catalysis and Surface Chemistry, Polish Academy of Sciences, Niezapominajek 8, 30-239 Krakow, Poland

### Content

|                                                                      |    |
|----------------------------------------------------------------------|----|
| 1. Synthetic procedures.....                                         | 1  |
| 2. HPLC and HRMS data .....                                          | 2  |
| 3. Electronic absorption data .....                                  | 5  |
| 4. DFT data for structures of the Ru1, Ru2, Ru3 complexes .....      | 5  |
| 5. Photostability of the Ru complexes .....                          | 7  |
| 6. Uptake of the Ru complexes.....                                   | 8  |
| 7. Synergetic effect of the studied Ru complexes and cisplatin ..... | 9  |
| 8. Photocytotoxicity of the Ru complexes under hypoxia.....          | 10 |
| 9. Reactive oxygen species generation <i>in vitro</i> .....          | 10 |
| 10. Cellular death mechanism.....                                    | 11 |

### 1. Synthetic procedures

#### Synthesis of 2,3-bis(2-pyridyl)quinoxaline

The synthesis was performed according to the procedure described in the literature [1]. To a solution of 2,2'-pyridyl (1.8 mmol) in absolute ethanol 1,2-phenylenediamine (1.80 mmol) was added. The resulted mixture was refluxed for 4 h. Next, the solvent was removed under reduced pressure to give the pure product **dpq** (58.5%). Anal. Calc. for C<sub>18</sub>H<sub>12</sub>N<sub>4</sub>: C (76.04%), H (4.26%), N (19.70%), Found: C (75.59%), H (4.114%), N (19.66%).

#### Synthesis of 2,3-bis(2-pyridyl)benzo[g]quinoxaline

The synthesis was performed according to the procedure described in the literature [1]. To a solution of 2,2'-pyridyl (1.4 mmol) in absolute ethanol 2,3- diaminonaphthalene (1.4

mmol) was added. The resulted mixture was refluxed for 4 h. Next, the solvent was removed under reduced pressure to give the pure product **dpb** (45.3%). Anal. Calc. for  $C_{22}H_{14}N_4$ : C (79.01%), H (4.23%), N (16.76%), Found: C (76.59%), H (4.181%), N (16.02%).

### Synthesis of $[Ru(dip)_2Cl_2]$ complex

The synthesis was performed according to the well-known literature procedure [2]. Ruthenium(III) chloride trihydrate (0.2 mmol) and 4,7-diphenyl-1,10-phenanthroline (dip) (0.4 mmol) with few drops of N-ethylmorpholine were dissolved in N,N-dimethylformamide (10 mL). The mixture was refluxed for 24 h. Then the solvent was removed under reduced pressure to c.a. 2 mL and 10 mL of acetone was added. After 24 h at  $-20^\circ C$ , the dark solid obtained was filtrated and washed with cold acetone, twice with diethyl ether and dried under vacuum. The crude violet product was finally purified by flash chromatography (neutral  $Al_2O_3$ , dichloromethane/methanol (2/98)) to give the pure product.

## 2. HPLC and HRMS data

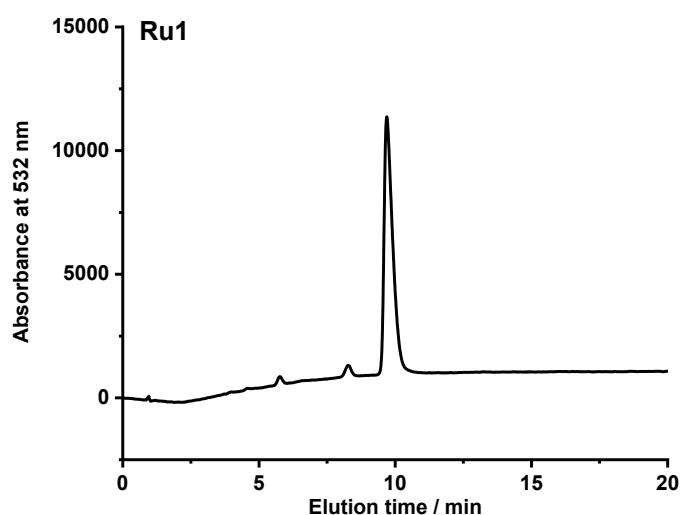

**Fig. S1.** The HPLC chromatogram for **Ru1**.

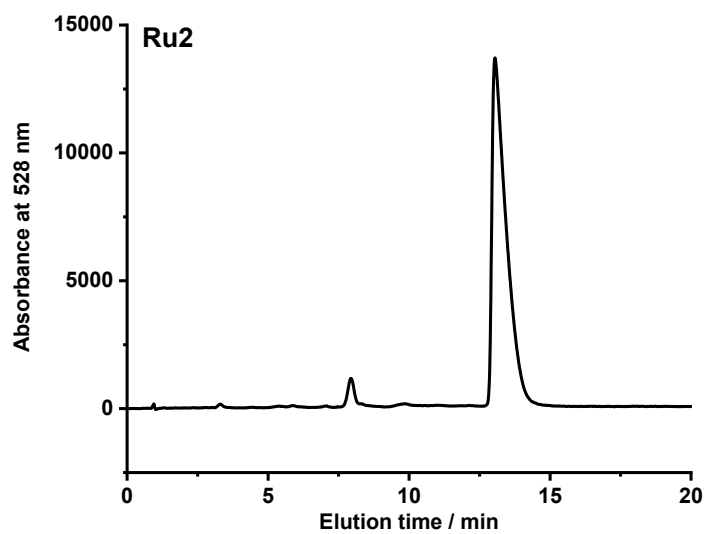

**Fig. S2.** The HPLC chromatogram for **Ru2**.

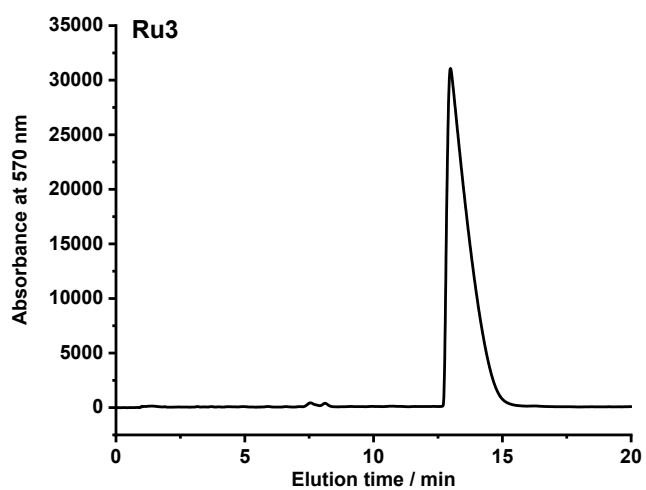

**Fig. S3.** The HPLC chromatogram for **Ru3**.

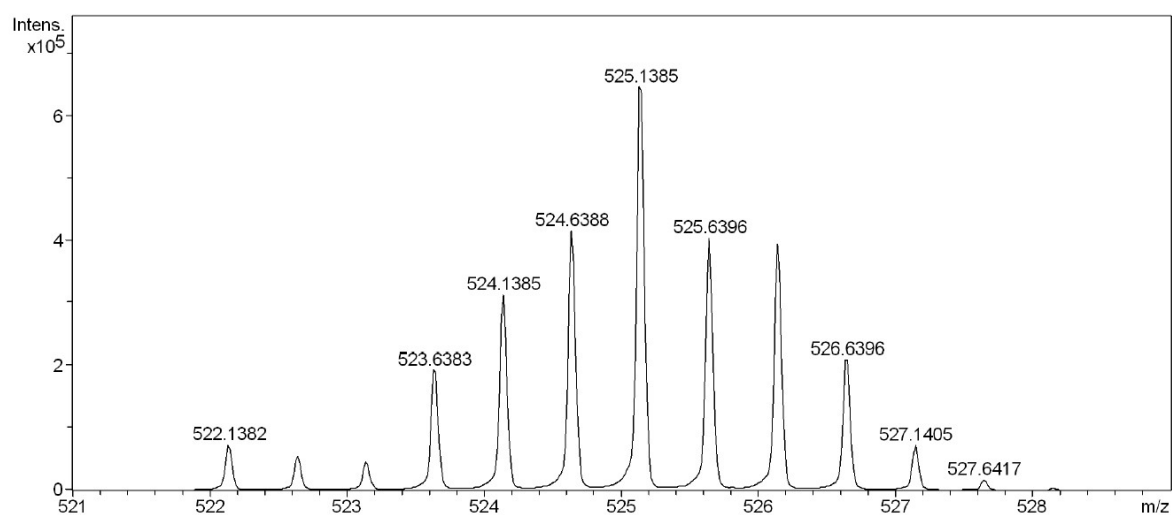

**Fig. S4.** HRMS spectra for **Ru1**.

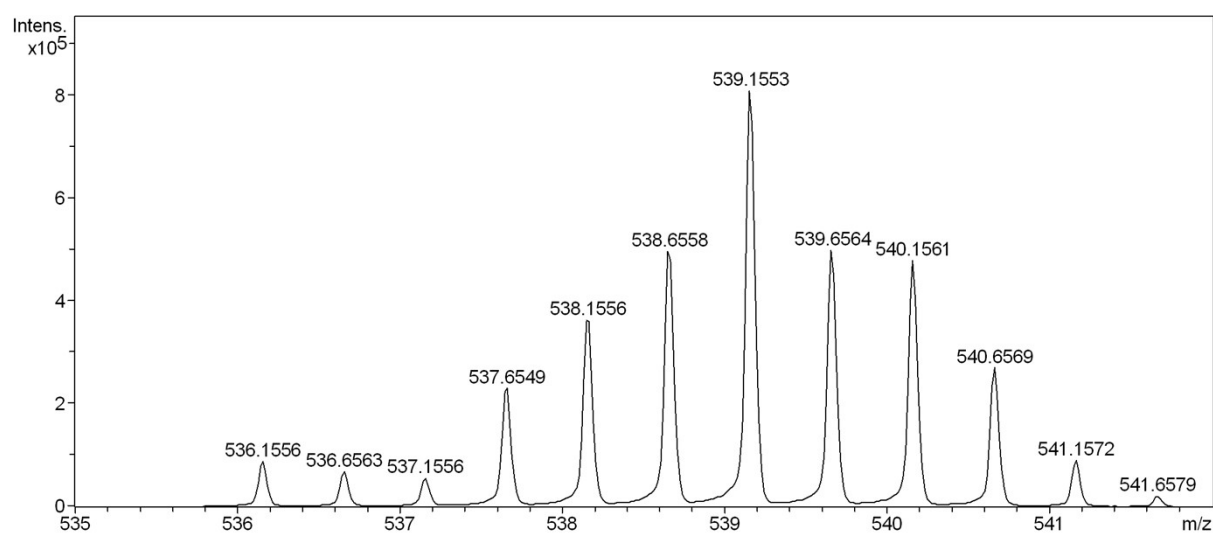

**Fig. S5.** HRMS spectra for **Ru2**.

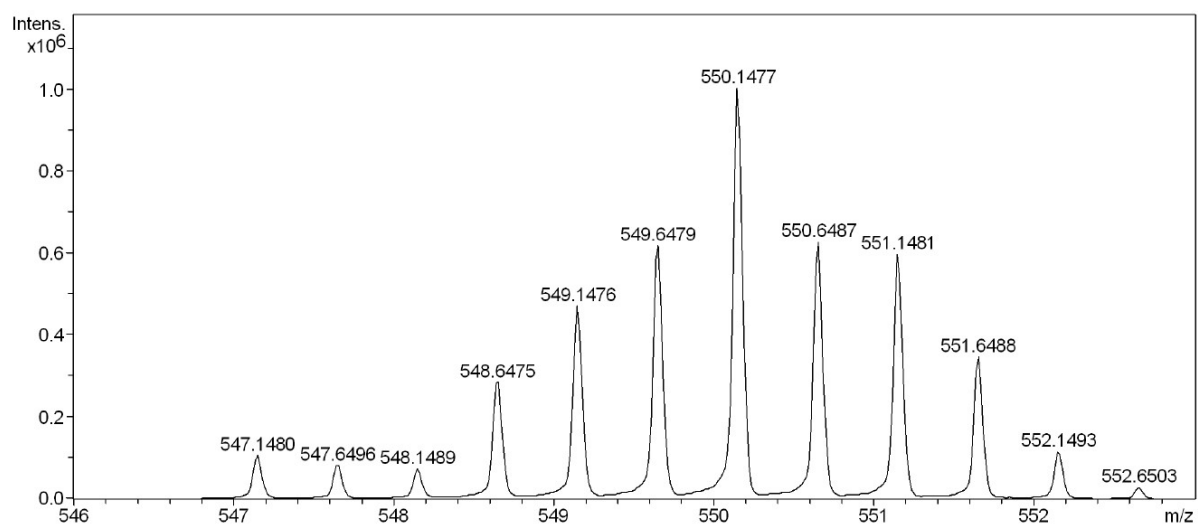

**Fig. S6.** HRMS spectra for **Ru3**.

### 3. Electronic absorption data

**Table S1.** Electronic absorption data for Ru(II) polypyridyl complexes in water.

|                                                                                                | $\lambda_{\max}$ [nm] | $\epsilon$ [ $10^4 \text{ M}^{-1} \text{ cm}^{-1}$ ] |
|------------------------------------------------------------------------------------------------|-----------------------|------------------------------------------------------|
| [Ru(dip) <sub>2</sub> (dpq)]Cl <sub>2</sub><br>( <b>Ru1</b> )                                  | 277                   | $7.61 \pm 0.29$                                      |
|                                                                                                | 388                   | $1.50 \pm 0.91$                                      |
|                                                                                                | 436                   | $1.33 \pm 0.57$                                      |
|                                                                                                | 532                   | $0.78 \pm 0.03$                                      |
|                                                                                                | 630 <sup>#</sup>      | $0.05 \pm 0.01$                                      |
| [Ru(dip) <sub>2</sub> (dpq-(CH <sub>3</sub> ) <sub>2</sub> )]Cl <sub>2</sub><br>( <b>Ru2</b> ) | 277                   | $5.12 \pm 0.59$                                      |
|                                                                                                | 390                   | $1.07 \pm 0.12$                                      |
|                                                                                                | 439                   | $0.86 \pm 0.10$                                      |
|                                                                                                | 528                   | $0.51 \pm 0.06$                                      |
|                                                                                                | 630 <sup>#</sup>      | $0.04 \pm 0.01$                                      |
| [Ru(dip) <sub>2</sub> (dpb)]Cl <sub>2</sub><br>( <b>Ru3</b> )                                  | 277                   | $9.61 \pm 1.58$                                      |
|                                                                                                | 395                   | $2.25 \pm 0.04$                                      |
|                                                                                                | 439                   | $1.75 \pm 0.28$                                      |
|                                                                                                | 570                   | $0.91 \pm 0.14$                                      |
|                                                                                                | 630 <sup>#</sup>      | $0.18 \pm 0.02$                                      |

<sup>#</sup>No maximum is observed, however, this wavelength is relevant for application compounds in PDT therapy.

### 4. DFT data for structures of the Ru1, Ru2, Ru3 complexes

**Table S2.** Relative total energies computed with the DFT-B3LYP/6-31G(d,p) and LANL2DZ method of two alternative geometries considered: the one in which both pyrazine and pyridyl rings of the L ligand were involved in coordination to form five-membered chelates (**Ru** structures), and the second in which two pyridyl rings were involved in seven-membered chelates (**Ru'** structures).

| Structure   | Relative energy [kJ/mol] |
|-------------|--------------------------|
| <b>Ru1</b>  | 0.0                      |
| <b>Ru'1</b> | 35.3                     |
| <b>Ru2</b>  | 0.0                      |
| <b>Ru'2</b> | 35.5                     |
| <b>Ru3</b>  | 0.0                      |
| <b>Ru'3</b> | 36.7                     |

A

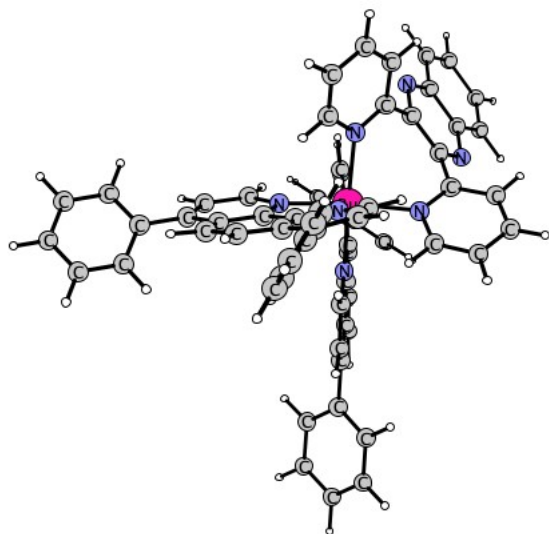

B

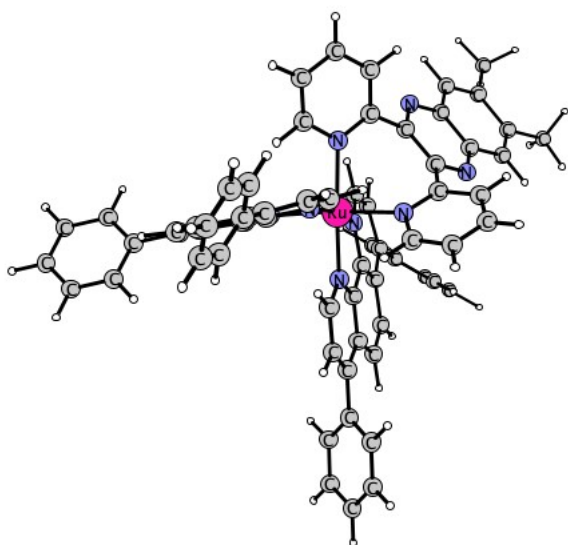

C

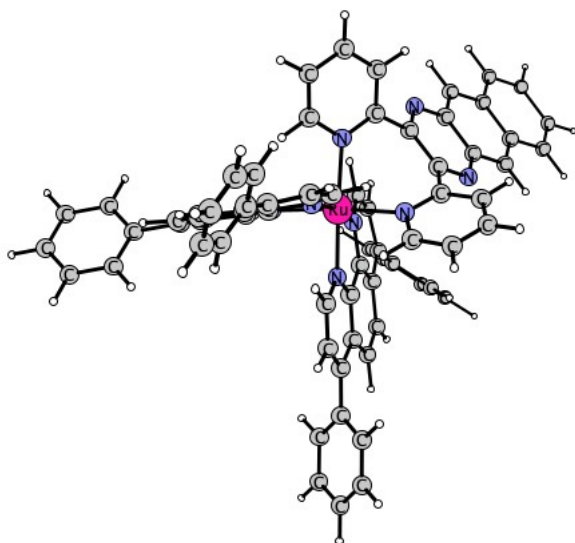

Fig. S7. Geometry structures of Ru'1 (A), Ru'2 (B), and Ru'3 (C).

## 5. Photostability of the Ru complexes

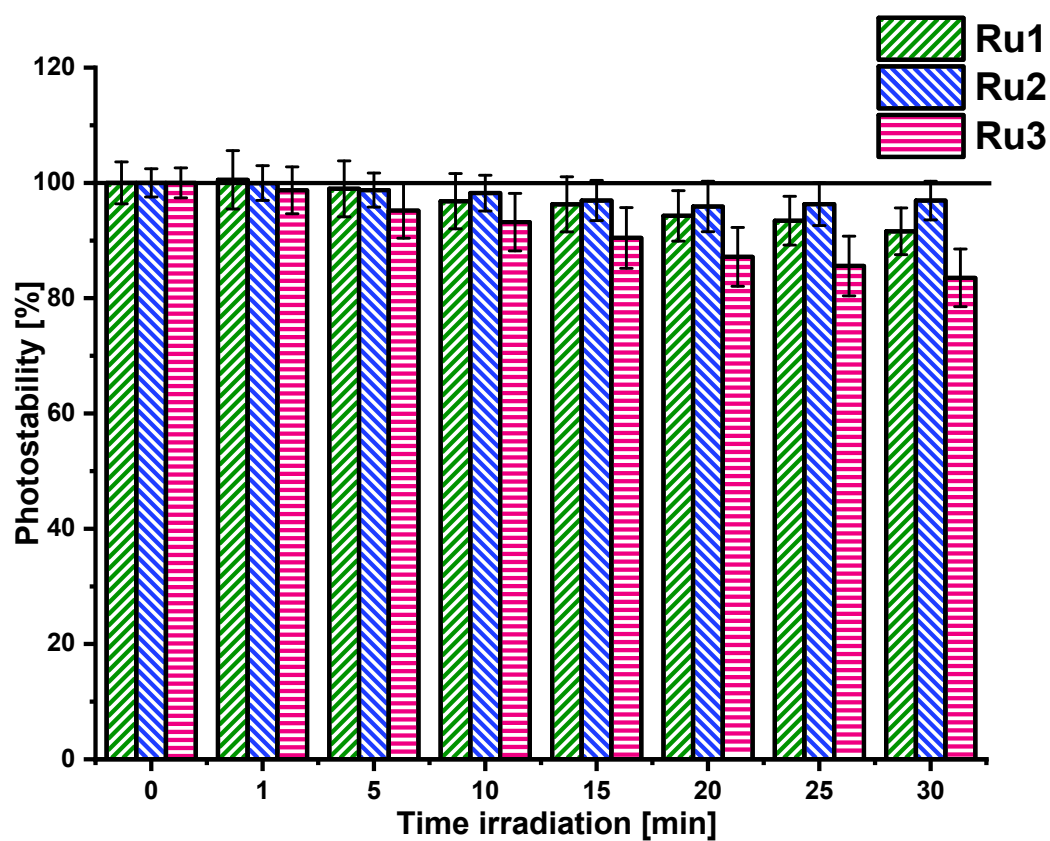

Fig. S8. Photostability of ruthenium complexes measured as changes in absorption in MLCT bands after irradiation with 465 nm light ( $17 \text{ mW/cm}^2$ ).  $[\text{Ru}] = 10\text{-}30 \text{ }\mu\text{M}$ , PBS pH 7.4.

## 6. Uptake of the Ru complexes

cLogP values for synthesized Ru(II) complexes were estimated using a series of  $[\text{Ru}(\text{dip})_2\text{L}]^{2+}$  complexes<sup>1</sup>. A strong correlation ( $R^2 = 0.996$ ) exists between measured  $\log P_{o/w}$  values for Ru(II) complexes and ones calculated for auxiliary ligands. The method was previously proved effective in case of difficulties with experimental determination of  $\log P_{o/w}$  for compounds.<sup>2</sup>

**Table S3.** Calculated logP for axillary ligands and Ru complexes as well as Ru accumulation in CT-26 and PANC-1 cells calculated as the ratio between  $[\text{Ru}]$  in cell (determined by ICP-MS) and  $[\text{Ru}]$  in cell medium used for cell treatment.

| Compound | cLogP for (L) | cLogP for Ru complexes | $[\text{Ru}_{\text{cell}}]/[\text{Ru}_{\text{medium}}]$ CT-26 | $[\text{Ru}_{\text{cell}}]/[\text{Ru}_{\text{medium}}]$ PANC-1 |
|----------|---------------|------------------------|---------------------------------------------------------------|----------------------------------------------------------------|
| Ru1      | 2.50          | 0.53                   | $38 \pm 12$                                                   | $54 \pm 18$                                                    |
| Ru2      | 3.45          | 0.76                   | $15 \pm 4$                                                    | $32 \pm 2$                                                     |
| Ru3      | 3.68          | 0.81                   | $71 \pm 7$                                                    | $100 \pm 14$                                                   |

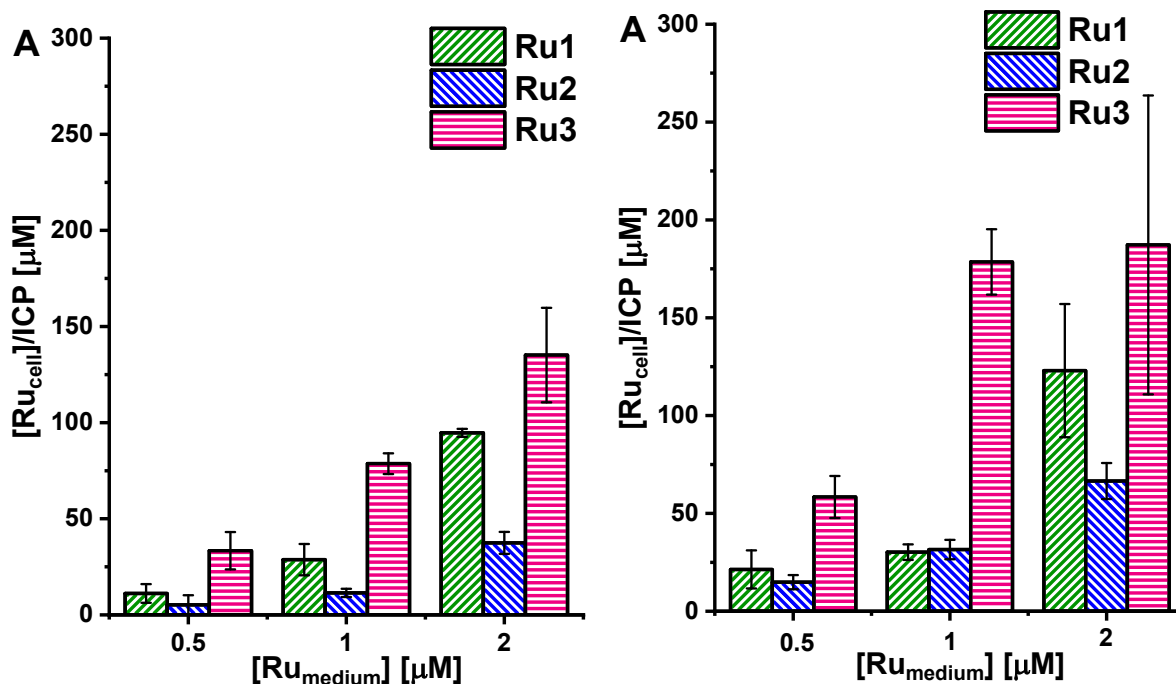

**Fig. S9.** Accumulation of Ru(II) complexes in CT-26 (A) and PANC-1 (B) cells was determined after 24 h incubation with the compounds.

## 7. Synergetic effect of the studied Ru complexes and cisplatin

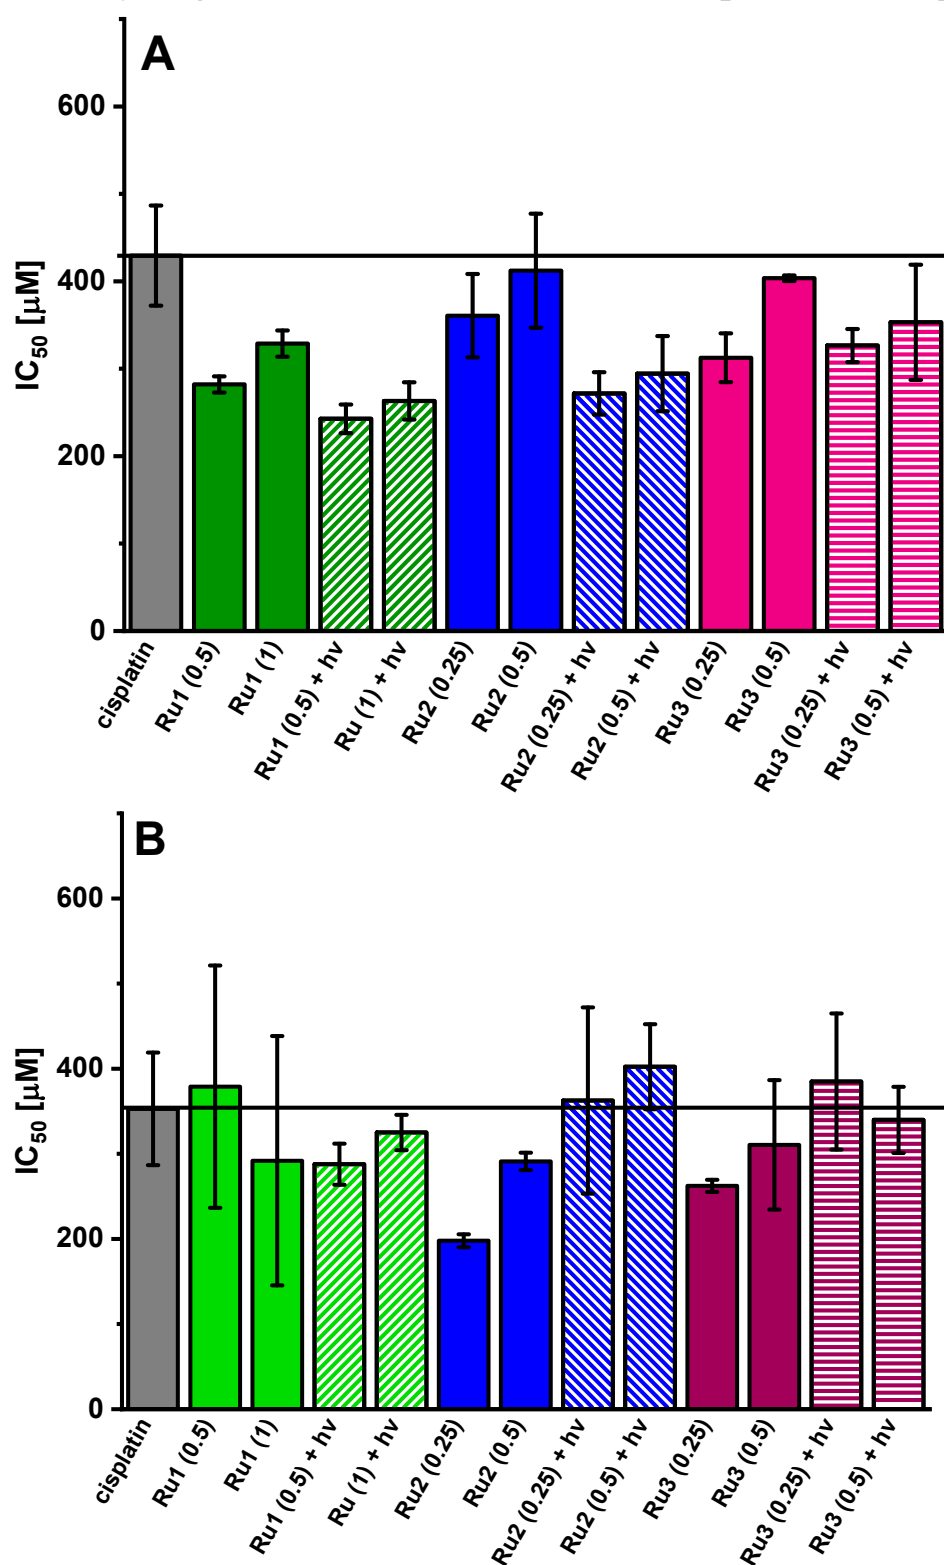

**Fig. S10.** Synergetic effect of tested Ru complexes combined with cisplatin evaluated on PANC-1 (A) and CT-26 (B) cells. Cells were incubated with a non-toxic concentration of Ru complexes (0.25, 0.5 or 1 μM) for 24 h at 37°C followed by washing with DPBS. Some of them were irradiated (+hv) and all of them were incubated for the next 24 h with cisplatin.

Experimental conditions: lamp wavelength: 465 nm; lamp power 16,7 mW / cm<sup>2</sup>, time of irradiation - 10 min.

## 8. Photocytotoxicity of the Ru complexes under hypoxia

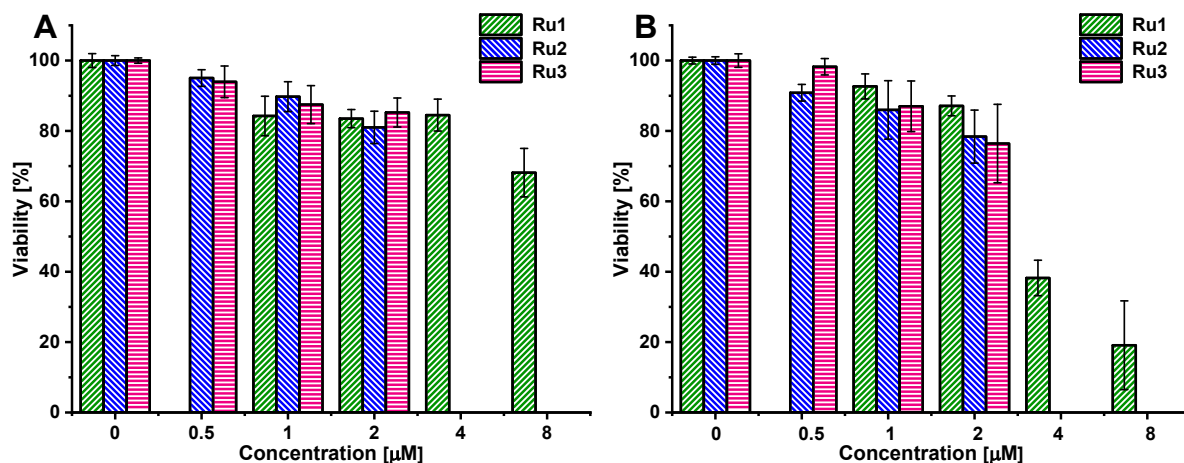

**Fig. S11.** Dose response plots for Ru(II) complexes in CT-26 (A) and PANC-1 (B) cell lines treated with 465 nm light (20 J/cm<sup>2</sup>) under hypoxic conditions.

## 9. Reactive oxygen species generation *in vitro*

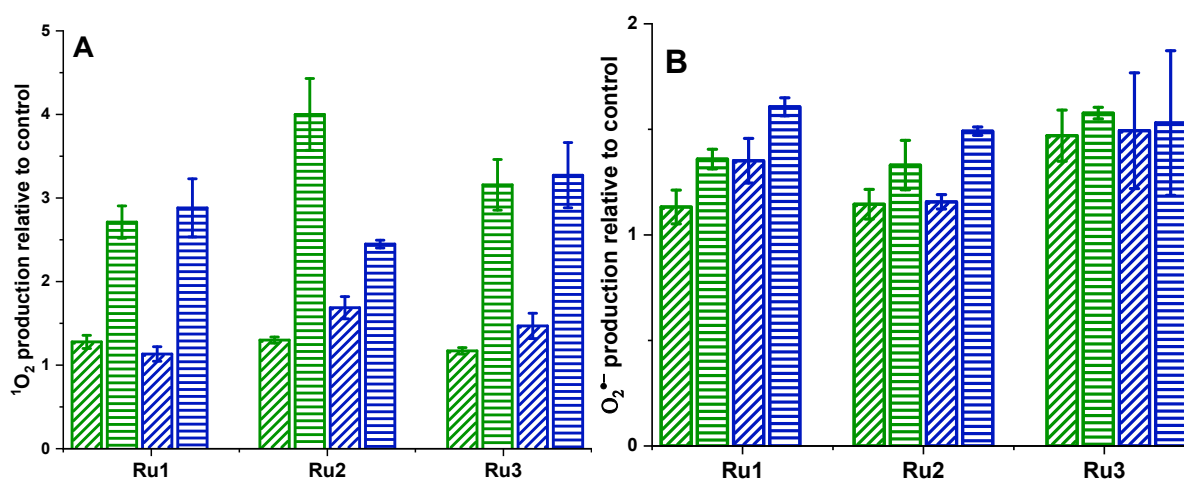

**Fig. S12.** Formation of reactive oxygen species upon treatment of CT-26 (green) and PANC-1 (blue) cells with 1.5 μM **Ru1**, **Ru2** or **Ru3** in the dark (oblique) or together with a visible light (horizontal) dose of 10 J/cm<sup>2</sup> (465 nm). The production of <sup>1</sup>O<sub>2</sub> was assessed with SOSG (A) while O<sub>2</sub><sup>•-</sup> with HE (B).

## 10. Cellular death mechanism

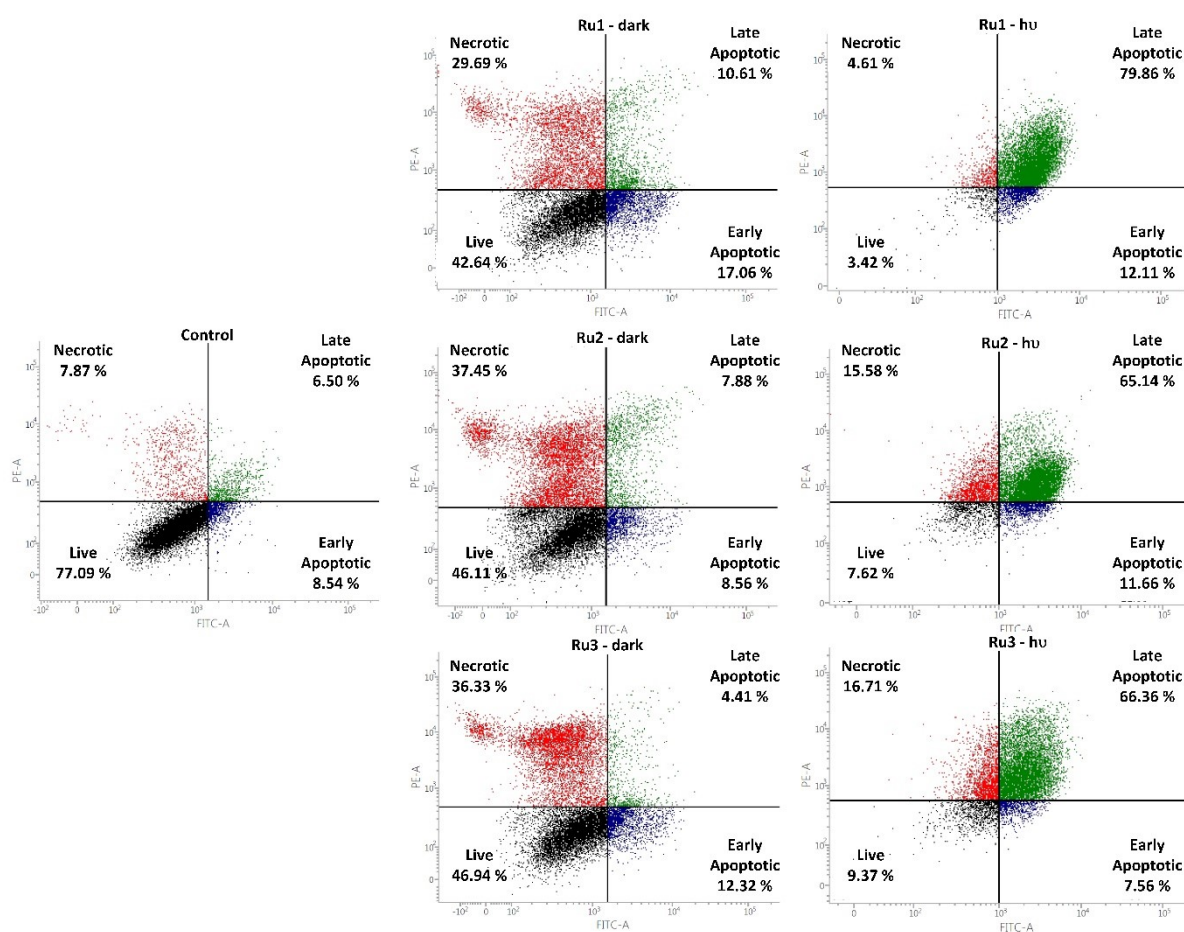

**Fig. S13.** The mechanism of cellular death in PANC-1 cells exposed to **Ru1-Ru3** (8  $\mu$ M) in the dark or after irradiation with a visible light dose of 10 J/cm<sup>2</sup> (465 nm) was studied using Annexin V-FITC/PI labeling.

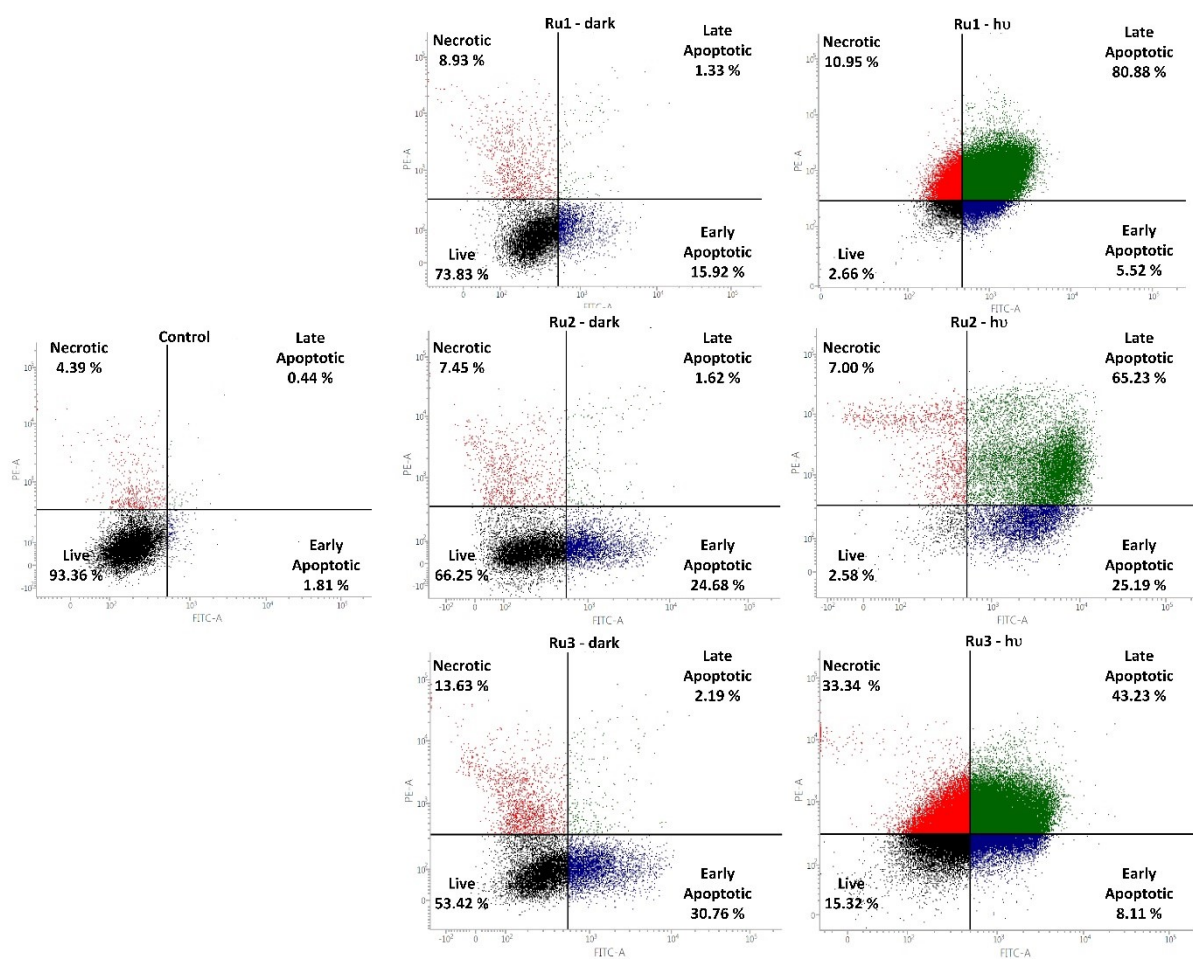

**Fig. S14.** The mechanism of cellular death in CT-26 cells exposed to **Ru1-Ru3** (8  $\mu$ M) in the dark or after irradiation with a visible light dose of 10 J/cm<sup>2</sup> (465 nm) was studied using Annexin V-FITC/PI labeling.

1. O. Mazuryk, K. Magiera, B. Rys, F. Suzenet, C. Kieda and M. Brindell, *J. Biol. Inorg. Chem.*, 2014, **19**, 1305-1316.
2. I. Gurgul, O. Mazuryk, M. Łomzik, P. C. Gros, D. Rutkowska-Zbik and M. Brindell, *Metallomics*, 2020, **12**, 784-793.
